# Supplementary material
Source: publisher site journal article supplement (https://www.dovepress.com/get_supplementary_file.php?f=206100.docx)
Supplement: Supplementary file 1 [file get_supplementary_file.php]

**Supplementary material**

**Table S1.** Overview of regression coefficients of TOPICS-CEP and TOPICS-CEP7

| **Variable** | **Tool** | **Adjustment** | **Regression coefficients** | |
| --- | --- | --- | --- | --- |
|  |  |  | **TOPICS-CEP** | **TOPICS-CEP7** |
| (In)dependence | Modified Katz ADL-15 | Sum | -0.12 | -0.13 |
| Morbidity | National health monitor | Sum | -0.13 | -0.14 |
| Social functioning | RAND-36 | Reversed | -0.01 | -0.03 |
| Quality of Life | RAND-36 |  | -0.02 | -0.07 |
| Psychological well-being | RAND-36 | Reversed and sum | -0.03 | -0.04 |
| Cognition | EQ-5D+C |  | -0.14 | -0.14 |
| Pain | EQ-5D |  | -0.03 | -0.08 |
| Health | RAND-36 |  | -0.17 | NA |

Note that the TOPICS-CEP is the original tool and that the TOPICS-CEP7 is the same tool with one less variable, as used in this study. Abbreviations**:** ADL, activities of daily living; CEP, composite endpoint; EQ-5D, five EuroQol dimensions (+C = plus the cognition add on questionnaire).
